# Supplementary material for: Rapid Capturing and Chemiluminescent Sensing of Programmed Death Ligand-1 Expressing Extracellular Vesicles
Source: MDPI journal article supplement (doi:10.3390/bios12050281), 2022-04-28
Supplement: s1 [file s1]

**Table S1.** The aptamer sequences used in the sensing assay.

| Name                  | Sequences (5' to 3')                          |
|-----------------------|-----------------------------------------------|
| PD-L1                 | AAGACGGACCAGCCTTGCCGCAAGACGGACCAGGGATT        |
| Biotin-PD-L1          | Biotin-AAGACGGACCAGCCTTGCCGCAAGACGGACCAGGGATT |
| Cy3-PD-L1             | Cy3-AAGACGGACCAGCCTTGCCGCAAGACGGACCAGGGATT    |
| Biotin-PD-L1-srambled | Biotin-ACGACATACCGGCCTTTCCGCAAGACGGACCAGGGGT  |

**Table S2.** The recovery (%) of the sensing assay.

| Spiked (EVs/mL) | Recovery (%) |
|-----------------|--------------|
| 10 <sup>6</sup> | 96.49 ± 3.59 |
| 10 <sup>7</sup> | 95.85 ± 2.94 |
| 10 <sup>8</sup> | 90.05 ± 3.14 |

*Note: The readings were obtained in triplicate for each sample.*

*The data is shown as mean ± standard deviation (%).*

**Table S3.** Clinical information of the patients enrolled in the study.

| S/No | Age | Sex | CEA<br>(ng/mL) | CA-125<br>(U/mL) | CYFRA21-1<br>(ng/mL) | NSE<br>(ng/mL) | EGFR | T   | N   | M   | Stage |
|------|-----|-----|----------------|------------------|----------------------|----------------|------|-----|-----|-----|-------|
| 1    | 45  | M   | N/A            | N/A              | N/A                  | N/A            | N/A  | N/A | N/A | N/A | N/A   |
| 2    | 56  | F   | N/A            | N/A              | N/A                  | N/A            | N/A  | N/A | N/A | N/A | N/A   |
| 3    | 37  | M   | N/A            | N/A              | N/A                  | N/A            | N/A  | N/A | N/A | N/A | N/A   |
| 4    | 43  | M   | N/A            | N/A              | N/A                  | N/A            | N/A  | N/A | N/A | N/A | N/A   |
| 5    | 42  | M   | N/A            | N/A              | N/A                  | N/A            | N/A  | N/A | N/A | N/A | N/A   |
| 6    | 39  | M   | N/A            | N/A              | N/A                  | N/A            | N/A  | N/A | N/A | N/A | N/A   |
| 7    | 57  | F   | N/A            | N/A              | N/A                  | N/A            | N/A  | N/A | N/A | N/A | N/A   |
| 8    | 66  | M   | 1.06           | 21.7             | 2.66                 | 18.5           | +    | T2b | N0  | M0  | IIB   |
| 9    | 65  | M   | 2.07           | 23.7             | 3.89                 | 16.9           | +    | T1b | N0  | M0  | IA2   |
| 10   | 63  | M   | 3.53           | 28.2             | 2.64                 | 15.9           | +    | T4  | N1  | M0  | IIA   |
| 11   | 56  | F   | 1.62           | 24.5             | 11.4                 | 41.8           | +    | T2a | N2  | M0  | IIB   |
| 12   | 70  | M   | 1.07           | 53.7             | 2.4                  | 14.9           | +    | T1c | N0  | M0  | IA3   |
| 13   | 71  | F   | 1.07           | 53.7             | 2.4                  | 14.9           | +    | T1c | N0  | M0  | IA3   |
| 14   | 72  | F   | 1.3            | 17.80            | 1.90                 | 11.75          | +    | T2a | N0  | M0  | IB    |
| 15   | 56  | F   | 0.97           | 15.4             | 1.03                 | 12.2           | +    | T2a | N1  | M0  | IIB   |
| 16   | 64  | M   | 3.53           | 28.2             | 2.64                 | 15.9           | +    | T4  | N1  | M0  | IIB   |
| 17   | 46  | F   | 0.68           | 6.5              | 1.58                 | 13.6           | +    | T2a | N0  | M1  | IV    |
| 18   | 66  | M   | 0.58           | 28.3             | 3                    | 11.7           | +    | T2b | N1  | M1  | IV    |
| 19   | 61  | M   | 50.84          | 80               | 21.1                 | 57.7           | +    | T3  | N2  | M1  | IV    |
| 20   | 69  | M   | 31.97          | 82.3             | 10.2                 | 13.6           | +    | T2  | N3  | M1  | IV    |
| 21   | 59  | F   | 1.8            | 6.8              | 5.4                  | 9.80           | +    | T3  | N3a | M1  | IV    |
| 22   | 57  | M   | 7.07           | 35               | 3.84                 | 9.88           | +    | T2  | N3  | M1  | IV    |
| 23   | 61  | M   | 50.84          | 80               | 21.1                 | 57.7           | +    | T2  | N1  | M1  | IV    |
| 24   | 61  | F   | 43.19          | 89.4             | 2.71                 | 12.8           | +    | T1  | N3  | M1  | IV    |
| 25   | 73  | M   | >100           | 76               | 4.89                 | 15.7           | +    | T4  | N3  | M1  | IV    |

**Note:** Carcinoembryonic antigen (CEA), Cancer antigen (CA)-125, cytokeratin 19 fragment antigen (CYFRA 21-1), Neuron-specific enolase (NSE), Epidermal growth factor receptor (EGFR), Tumor Size (T), Nodules (N), Metastasis(M), Not available (N/A).

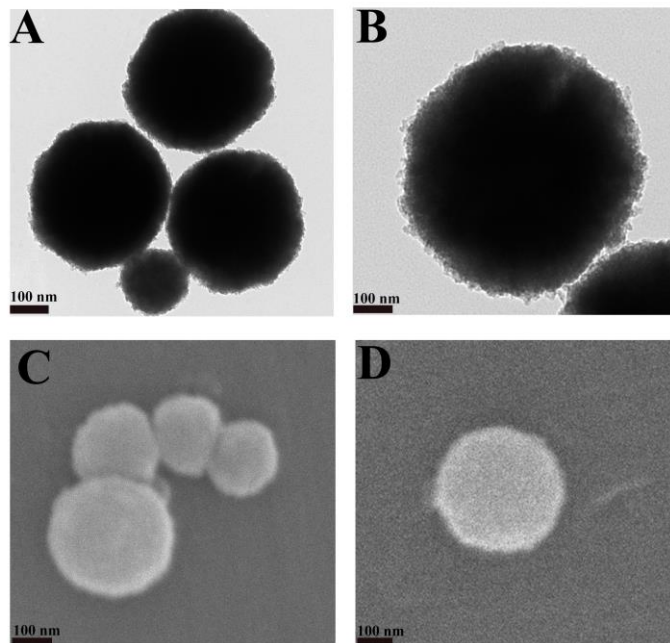

**Figure S1.** TEM and SEM images of  $\text{Fe}_3\text{O}_4@\text{TiO}_2$ . (A) multiple  $\text{Fe}_3\text{O}_4@\text{TiO}_2$  (B) single  $\text{Fe}_3\text{O}_4@\text{TiO}_2$  (C) multiple  $\text{Fe}_3\text{O}_4@\text{TiO}_2$  (D) Single  $\text{Fe}_3\text{O}_4@\text{TiO}_2$ .

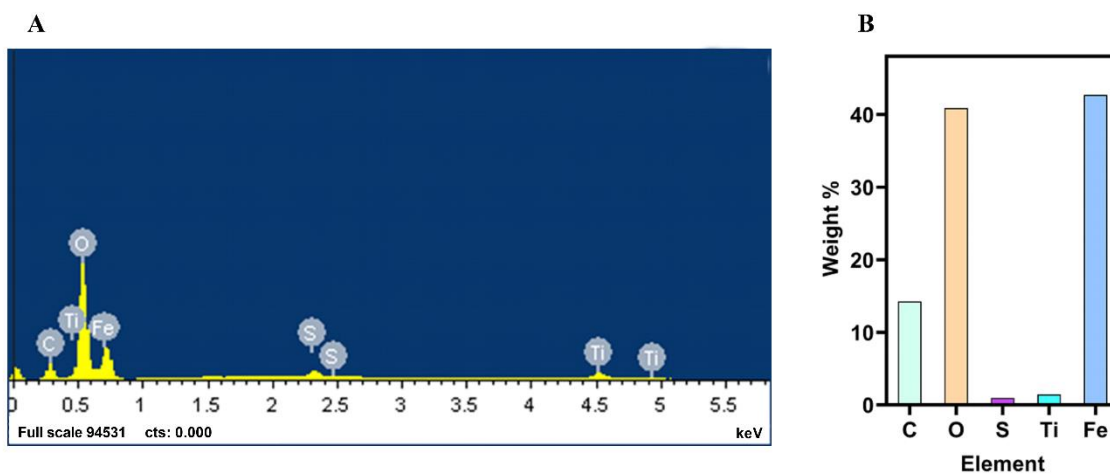

**Figure S2.** XDS analysis of  $\text{Fe}_3\text{O}_4@\text{TiO}_2$ . (A) XDS spectrum of the  $\text{Fe}_3\text{O}_4@\text{TiO}_2$  beads (B) Percentage weight of respective elements.

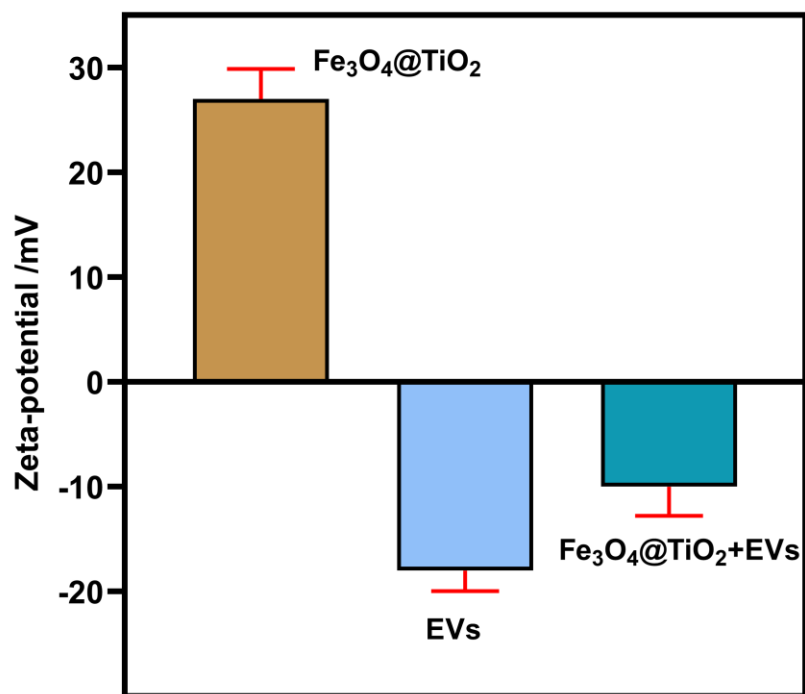

**Figure S3.** Zetapotential of  $\text{Fe}_3\text{O}_4@\text{TiO}_2$  beads, EVs and  $\text{Fe}_3\text{O}_4@\text{TiO}_2$  with EVs.

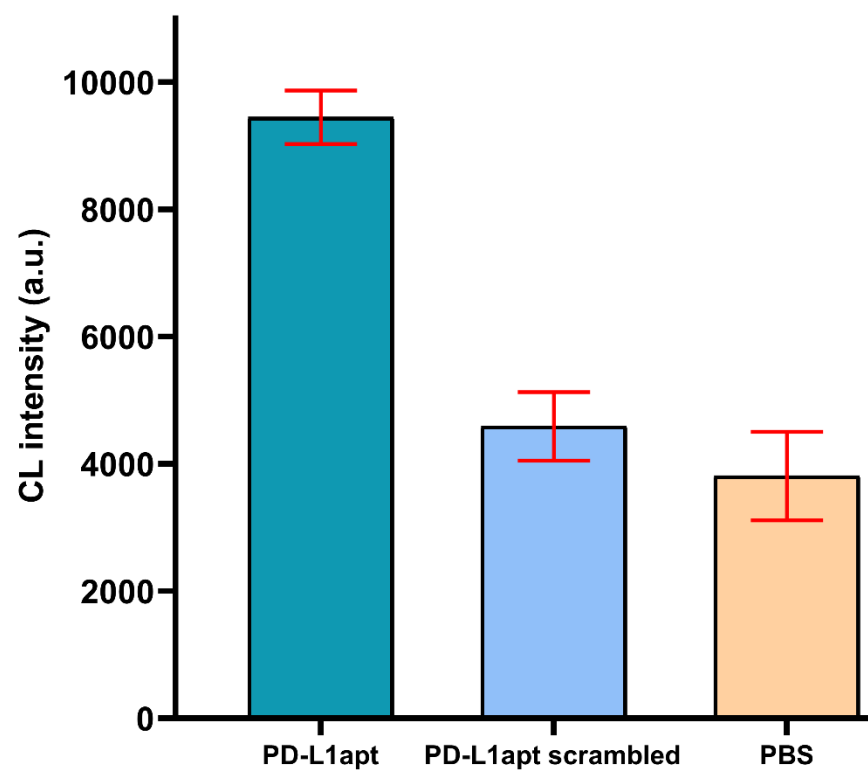

Figure S4. PD-L1 aptamer specificity.

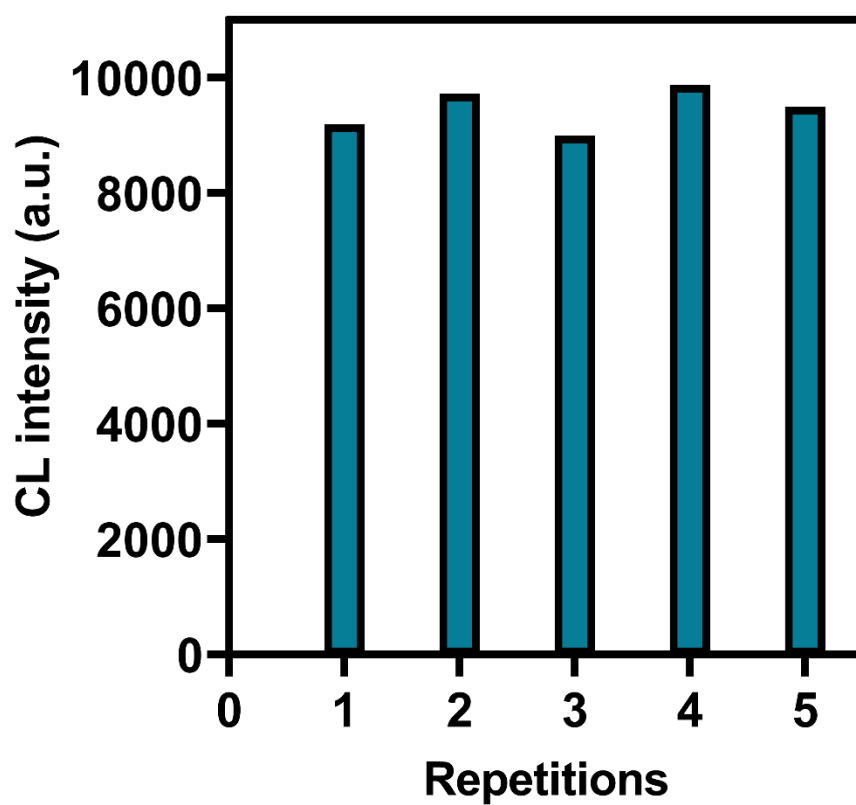

Figure S5. Repetitions for the confirming the analytical performance of the method.  
Repetitions (1-5) of  $10^7$  EVs/mL. (Relative standard deviation=**4.41** %, mean value=9276.4).
